# Supplementary material for: Design and synthesis of novel glycyrrhetinic acid-triazole derivatives that exert anti-plasmodial activity inducing mitochondrial-dependent apoptosis in Plasmodium falciparum
Source: Royal Society of Chemistry journal article supplement (doi:10.1039/d2nj05302k), 2023-01-01
Supplement: d2nj05302k1.pdf [file d2nj05302k1.pdf]

## Supplementary Material

### **Design and synthesis of Novel Glycyrrhetic acid-triazole derivatives Exerts Anti-plasmodial Activity Inducing Mitochondrial dependent apoptosis in Plasmodium falciparum**

Deepak Singh Kapkoti<sup>a1</sup>, Saurabh Kumar<sup>b1</sup>, Ashish Kumar<sup>b</sup>, Mahendra P. Darokar<sup>b</sup>, Anirban Pal<sup>b\*</sup>, Rajendra Singh Bhakunia\*

<sup>a</sup>Phytochemistry Division, CSIR-Central Institute of Medicinal and Aromatic Plants, Lucknow, India

<sup>b</sup>Bioprospection and Product Development Division, CSIR- Central Institute of Medicinal and Aromatic Plants, Lucknow, India

<sup>1</sup>Authors contributed equally

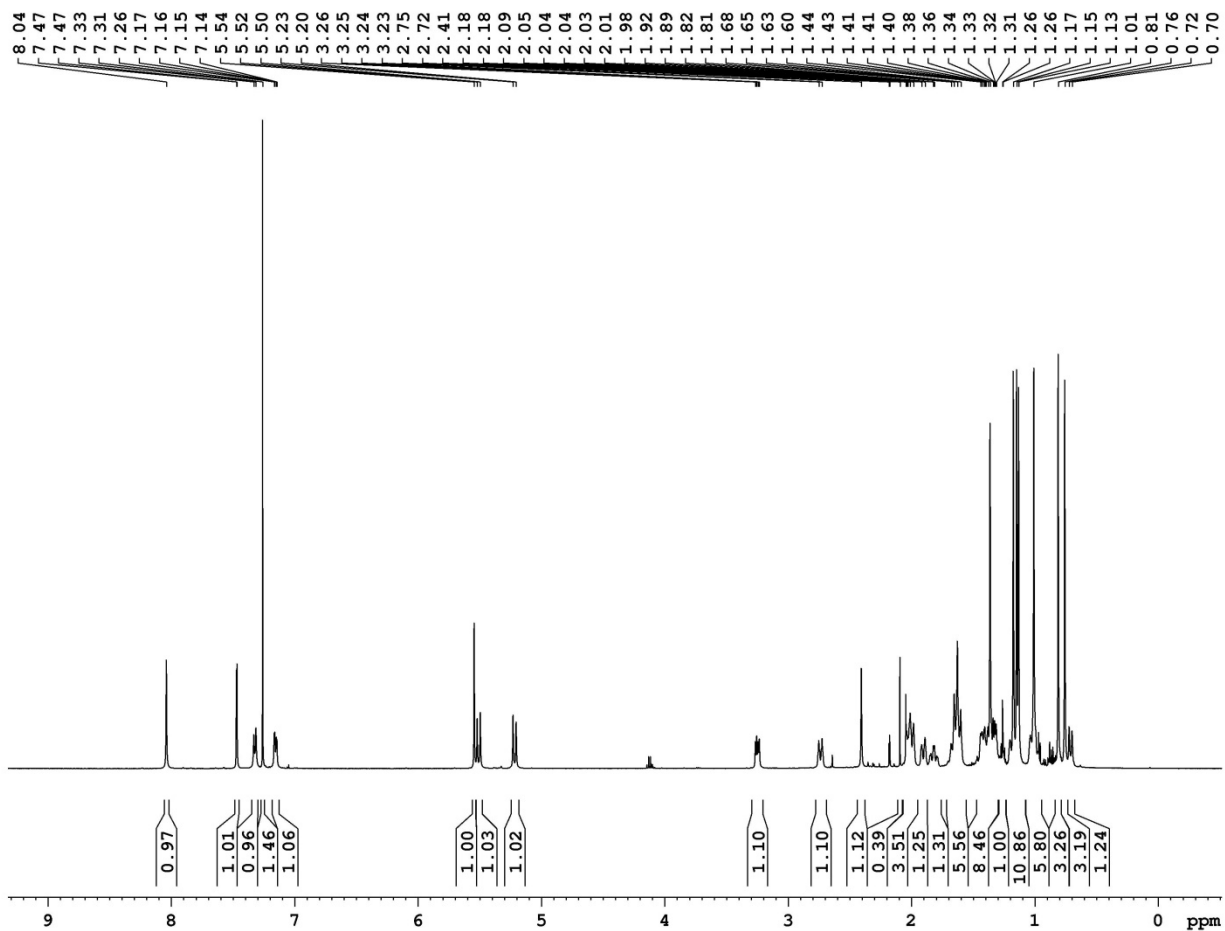

Figure S1:  $^1\text{H}$  NMR spectra of compound 17

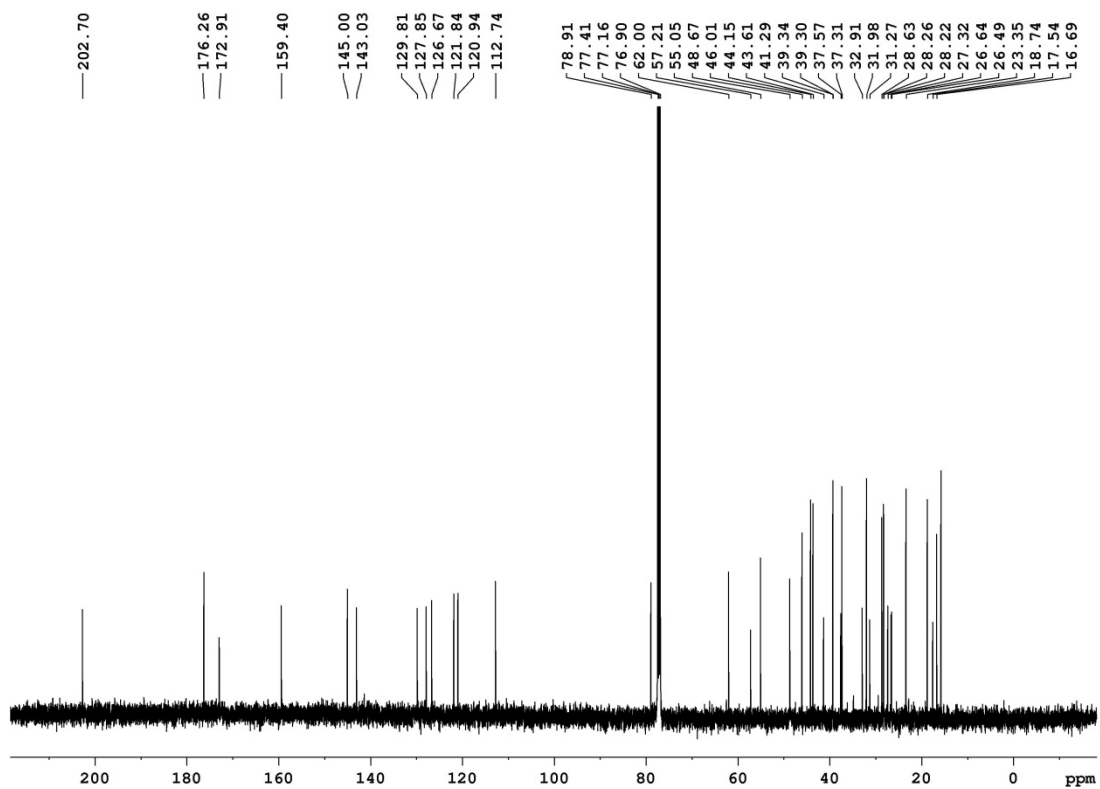

Figure S2: <sup>13</sup>C NMR spectra of compound 17

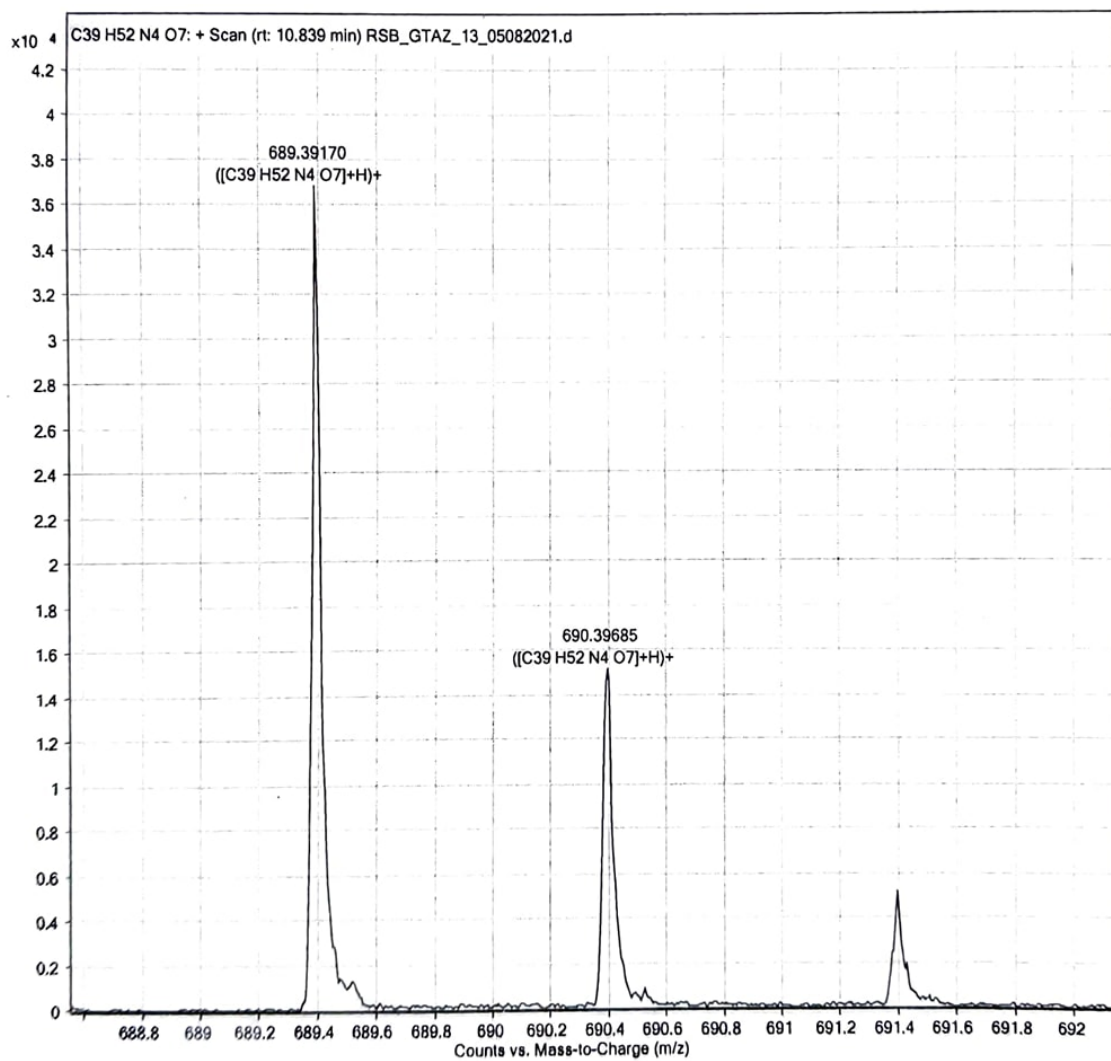

Figure S3: HRMS spectra (ESI) of compound 17

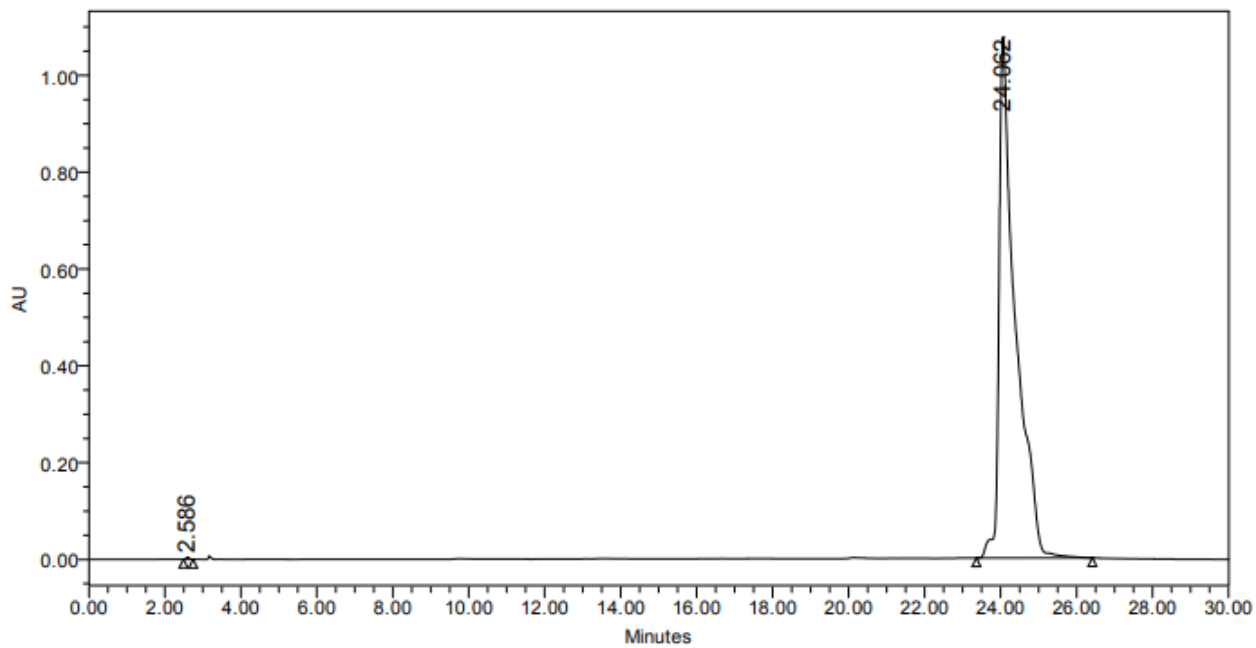

|   | RT     | Area     | % Area | Height  |
|---|--------|----------|--------|---------|
| 1 | 2.586  | 21253    | 0.07   | 3784    |
| 2 | 24.062 | 32243329 | 99.93  | 1075333 |

**Figure S4: HPLC Chromatogram of compound 17**
